# Supplementary material for: Recent Insights into Sample Pretreatment Methods for Mycotoxins in Different Food Matrices: A Critical Review on Novel Materials
Source: MDPI journal article supplement (doi:10.3390/toxins15030215), 2023-03-10
Supplement: s1 [file s1]

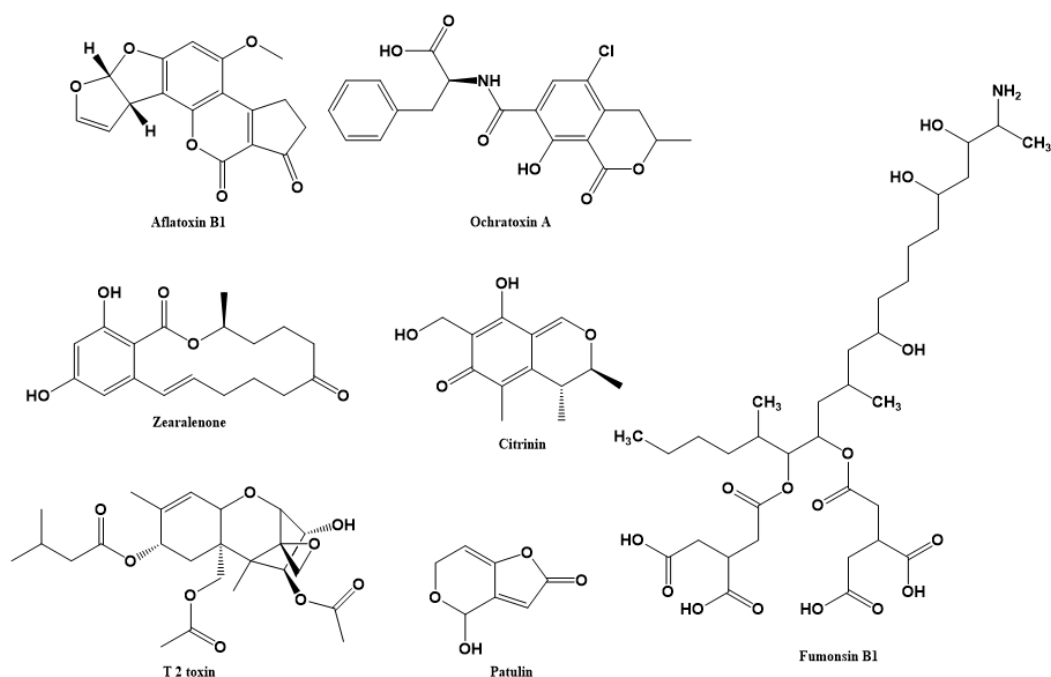

**Figure S1.** Chemical structure of major mycotoxins.

**Table S1.** The main classification of mycotoxins, representative toxins of each type and their toxicological effects.

| Main Classification | Representative Toxins                                                                                                                                        | Effect on Mammalian                                                           | Ref. |
|---------------------|--------------------------------------------------------------------------------------------------------------------------------------------------------------|-------------------------------------------------------------------------------|------|
| AFs                 | AFB1, AFB2, AFG1, AFG2, and AFM1                                                                                                                             | Carcinogenic, acute hepatitis, impaired immune system                         | [5]  |
| CIT                 | CIT                                                                                                                                                          | Nephrotoxic                                                                   | [2]  |
| FBs                 | FB1 and FB2                                                                                                                                                  | Carcinogenic, hepatotoxic, causative agent in leukoencephalomalacia in horses | [6]  |
| TCTs                | T-2 and HT-2                                                                                                                                                 | Immuno-depressants, gastrointestinal haemorrhaging                            | [7]  |
| OTs                 | OTA                                                                                                                                                          | Carcinogenic, nephrotoxic, hepatotoxic, teratogenic                           | [8]  |
| PAT                 | PAT                                                                                                                                                          | Lung and brain haemorrhaging, carcinogenic, immunotoxic, genotoxic            | [9]  |
| ZEA                 | ZEA and its five metabolites $\alpha$ -zearelanol ( $\alpha$ -ZEL), $\beta$ -ZEL, $\alpha$ -zearelanol ( $\alpha$ -ZAL), $\beta$ -ZAL, and zearelanone (ZAN) | Estrogenic activity, potential carcinogenic and teratogenic                   | [10] |

**Table S2.** Sample pretreatment methods used for mycotoxins since 2017.

| Matrix                   | Targets          | Pretreatment Methods | Ref. |
|--------------------------|------------------|----------------------|------|
| rice                     | AFB1, B2, G1, G2 | SLE                  | [16] |
| rice                     | AFB1, B2, G1, G2 | SLE-DES              | [17] |
| rice and fragrant rice   | AFB1, B2, G1, G2 | SLE-SPE              | [18] |
| rice and noodle products | AFB1, B2, G1, G2 | SPE                  | [19] |
| rice and wheat           | AFB1, B2, G1, G2 | SPE                  | [20] |
| rice and sorghum         | AFB1, B2, G1, G2 | MSPE                 | [21] |
| rice and maize           | AFB1, B2, G1, G2 | MSPE                 | [22] |

|                                              |                                                         |                      |      |
|----------------------------------------------|---------------------------------------------------------|----------------------|------|
| rice, edible oil and milk                    | AFB1, B2, G1, G2                                        | MSPE                 | [23] |
| corn, rice and millet                        | AFB1, B2, G1, G2                                        | MSPE                 | [24] |
| rice grain                                   | AFB1, Sterigmatocystin, ZEA                             | IT-SPME              | [25] |
| rice bran                                    | 13 mycotoxins                                           | DLLME                | [26] |
| rice                                         | AFB1, B2, G1, G2                                        | AA-DLLME             | [27] |
| rice                                         | AFB1, B2, G1, G2                                        | VALDS-ME             | [28] |
| rice                                         | AFs                                                     | MSPE                 | [29] |
| cereal products                              | HT-2 and T-2                                            | SPE                  | [30] |
| cereals                                      | AFB1, B2, G1, G2                                        | SPE                  | [31] |
| cereal matrices                              | 6 TCTs                                                  | SWE-SPE              | [32] |
| cereals                                      | AFB1, B2, G1, G2                                        | MSPE                 | [33] |
| cereals                                      | AOH, AME, ALT, TEN, and TeA                             | QuEChERS-DLLME       | [34] |
| cereals                                      | DON and ZEA                                             | QuEChERS             | [35] |
| corn and peanut                              | AFB1                                                    | SPE                  | [36] |
| corn meal                                    | AFB1, B2, G1, G2, FB1, and ZEA                          | SLE                  | [37] |
| corn and corn products                       | FB1 and FB2                                             | SPE                  | [38] |
| corn                                         | ZEA and its derivatives                                 | SPE                  | [39] |
| corn powder                                  | FB1                                                     | syringe SPE          | [40] |
| maize                                        | AFs, ochratoxins and enniatins                          | MSPE                 | [41] |
| maize                                        | ZEA and its derivatives                                 | MSPE                 | [42] |
| maize                                        | FB1 and FB2                                             | MSPD                 | [43] |
| maize and oats                               | DON, T-2                                                | SPE                  | [44] |
| maize, wheat, watermelon and melon           | AFB1, B2, G1, G2, OTA, OTB, T-2, HT-2 and DAS           | MSPE                 | [45] |
| wheat and peanut                             | AFB1, B2, G1, G2                                        | D- $\mu$ -SPE        | [46] |
| wheat                                        | AFB1, B2, G1, G2                                        | DLLME                | [47] |
| wheat                                        | AFs                                                     | IL-DLLME             | [48] |
| wheat and maize                              | AFB1, B2, G1, G2, OTA, STE, FB1, FB2, T-2, DON, and ZEA | QuEChERS             | [49] |
| cornmeal                                     | AFB1, B2, G1, G2                                        | MSPD                 | [50] |
| cornmeal                                     | ZEN                                                     | MSPE                 | [51] |
| infant consumption cereal-based porridge     | 14 mycotoxins                                           | UAE                  | [52] |
| cereal-derived products                      | AFs, T-2 and HT-2 toxins, and fumonisins                | QuEChERS             | [53] |
| soybean                                      | AFB1, B2, G1, G2                                        | in-syringe SPE-DLLME | [54] |
| peanut                                       | AFB1                                                    | SPME                 | [55] |
| peanut, almond and pistachio                 | 16 mycotoxins                                           | QuEChERS             | [56] |
| fresh peanut                                 | AFB1                                                    | UAE                  | [57] |
| peach seed, milk powder, corn flour and beer | FB1, AFB1, OTB, T-2 toxin, OTA and ZEA                  | MA-d- $\mu$ -SPE     | [58] |
| biscuit                                      | 9 mycotoxins                                            | QuEChERS             | [59] |
| foodstuffs                                   | AOH and AME                                             | SPE                  | [60] |
| foodstuffs                                   | AFB1, B2, G1, G2, AFM1, and AFM2                        | MSPE                 | [61] |
| peanut oils                                  | AFB1                                                    | LLE-SPE              | [62] |
| edible oils                                  | AFB1, B2, G1, G2                                        | LLE-SPE              | [63] |
| edible vegetable oils                        | AFB1, B2, G1, G2                                        | MSPE                 | [64] |
| vegetable oil                                | FB1, ZON and OTA                                        | MSPE                 | [65] |
| vegetable oils                               | AFB1, B2, G1, G2                                        | MSPE                 | [66] |
| edible oil, soy sauce and bean sauce         | 12 mycotoxins                                           | SPE                  | [67] |
| milk powders                                 | AFB1, B2, G1, G2 and M1                                 | SPE                  | [68] |
| milk and dairy products                      | AFM1                                                    | SPE                  | [69] |
| milk                                         | AFM1                                                    | SPE                  | [70] |

|                                                              |                                                         |                   |       |
|--------------------------------------------------------------|---------------------------------------------------------|-------------------|-------|
| milk                                                         | 9 mycotoxins                                            | SPE               | [71]  |
| milk and yogurt                                              | 6 mycotoxins                                            | MSPE              | [72]  |
| milk                                                         | AFM1                                                    | SALLE-on-line SPE | [73]  |
| soy milk                                                     | AFB1, B2, G1, G2                                        | D- $\mu$ -SPE     | [74]  |
| milk                                                         | AFM1                                                    | DES-DLLME         | [75]  |
| egg and milk                                                 | 39 mycotoxins and metabolites                           | QuEChERS          | [76]  |
| functional vegetable milks                                   | FB1 and B2, HT-2 and T-2, ZEA, DON and fusarenon-X      | SALLE             | [77]  |
| yogurt                                                       | AFs                                                     | DLLME             | [78]  |
| cheese                                                       | 32 mycotoxins                                           | QuEChERS          | [79]  |
| nuts                                                         | OTA, AFB1, B2, G1, G2                                   | dilute-and-shoot  | [80]  |
| nut                                                          | AFB1, B2, G1, G2                                        | SPE               | [81]  |
| nuts                                                         | AFB1, B2, G1, G2                                        | MSPE              | [82]  |
| Pistachio nuts                                               | AFB1, B2, G1, G2, OTA, ZEA, T2, and HT2                 | QuEChERS          | [83]  |
| chestnut                                                     | 14 mycotoxins                                           | d-SPE-QuEChERS    | [84]  |
| fruits and vegetables                                        | 7 mycotoxins                                            | SPE               | [85]  |
| apple products and dried fruits                              | patulin                                                 | VA-DSPME          | [86]  |
| apple juice                                                  | patulin                                                 | SD-LLLME          | [87]  |
| fruit berry by-products                                      | AFs, OTA and Alternaria toxins                          | QuEChERS          | [88]  |
| grapes, processed grape products and animal-derived products | OTA                                                     | QuEChERS          | [89]  |
| strawberries                                                 | patulin                                                 | QuEChERS          | [90]  |
| red-pigmented fruits                                         | patulin                                                 | QuEChERS          | [91]  |
| button mushroom                                              | 13 mycotoxins                                           | Dilute-and-shoot  | [92]  |
| tomato-based and fruit-based products                        | AOH, AME, TeA, and TEN                                  | QuEChERS          | [93]  |
| tomatoes and derived tomato products                         | AME, AOH, TEN, TeA, ALT, ENNs A, A1, B, and B1, and BEA | QuEChERS          | [11]  |
| fruits, vegetables and their derivatives marketed            | AOH                                                     | QuEChERS          | [94]  |
| chili pepper and processed groundnut                         | AFB1, B2, G1, G2                                        | SPME              | [95]  |
| feed                                                         | FB <sub>1</sub> and FB <sub>2</sub>                     | SLE-SPE           | [96]  |
| animal feed and food                                         | 11 mycotoxins                                           | SLE-SPE           | [97]  |
| fish feed                                                    | AFB1, B2, G1, G2                                        | $\mu$ -SPE        | [98]  |
| feed ingredients and compound feeds                          | 11 Mycotoxins                                           | QuEChERS          | [99]  |
| mixed feed rations                                           | 25 mycotoxins                                           | (d)SPE-QuEChERS   | [100] |
| feed                                                         | 15 mycotoxins                                           | QuEChERS          | [101] |
| animal feeds                                                 | ENNs and BEA                                            | QuEChERS          | [102] |
| feed and foodstuffs                                          | CIT and OTA                                             | QuEChERS          | [103] |
| beer, red wine, corn, and Turkish coffee                     | OTA                                                     | SPE               | [104] |
| beer                                                         | ZEA                                                     | on-line SPE       | [105] |
| wine                                                         | OTA                                                     | on-line SPE       | [106] |
| beer                                                         | 23 mycotoxins                                           | QuEChERS          | [107] |
| dark tea                                                     | AFB1, B2, G1, G2                                        | MFC-IAC           | [108] |
| dark tea                                                     | AFB1, B2, G1, G2                                        | QuEChERS          | [109] |
| Pu-erh tea                                                   | AFB1                                                    | QuEChERS          | [110] |
| coffee beans                                                 | 17 mycotoxins                                           | QuEChERS          | [111] |
| cocoa beans                                                  | ochratoxin A and AFB1, B2, G1, G2                       | QuEChERS          | [112] |
| non-dairy beverages                                          | AFB1, B2                                                | $\mu$ -SPE        | [113] |

|                                                        |                                                                    |                    |       |
|--------------------------------------------------------|--------------------------------------------------------------------|--------------------|-------|
| plant-based beverages                                  | AFB1, B2, G1, G2, OTA and DON, ZEA, T-2, HT-2, FB1 and FB2         | QuEChERS           | [114] |
| edible and medicinal herbs                             | 6 AFs and 6 ZEAs                                                   | SPE                | [115] |
| <i>Salviae miltiorrhiza Radix et Rhizoma</i> (Danshen) | ZEA, T-2, HT-2, NEO, DAS                                           | MSPE               | [116] |
| Indian medicinal herbs                                 | AFB1, B2, G1, G2                                                   | QuEChERS           | [117] |
| functional and medicinal herbs                         | AFB1, B2, G1, G2, OTA, ZEA, DON, FB1, B2, B3 and T-2               | SPE (IAC)-QuEChERS | [118] |
| rat faeces                                             | DON, 3AcDON, 15AcDON, DON3G, and DOM-1                             | QuEChERS-d-SPE     | [119] |
| human urine                                            | ZEA, $\alpha$ -ZEL, $\beta$ -ZEL, $\alpha$ -ZAL, $\beta$ -ZAL, ZAN | SPE                | [120] |
| pig hair                                               | FB <sub>1</sub>                                                    | SLE-SPE            | [121] |
| chicken liver                                          | DON, 3-ADON, 15-ADON, NIV, FUS-X, NEO, HT-2 and T-2                | QuEChERS           | [122] |
| endometrial cancer tissues                             | ZEA                                                                | QuEChERS           | [123] |
